# Supplementary material for: A plasma metabolomic signature discloses human breast cancer
Source: PubMed Central journal article supplement (PMC5386702; doi:10.18632/oncotarget.14521), 2017-01-05
Supplement: oncotarget-08-19522-s001.pdf [file oncotarget-08-19522-s001.pdf]

# A plasma metabolomic signature discloses human breast cancer

## SUPPLEMENTARY FIGURES AND TABLES

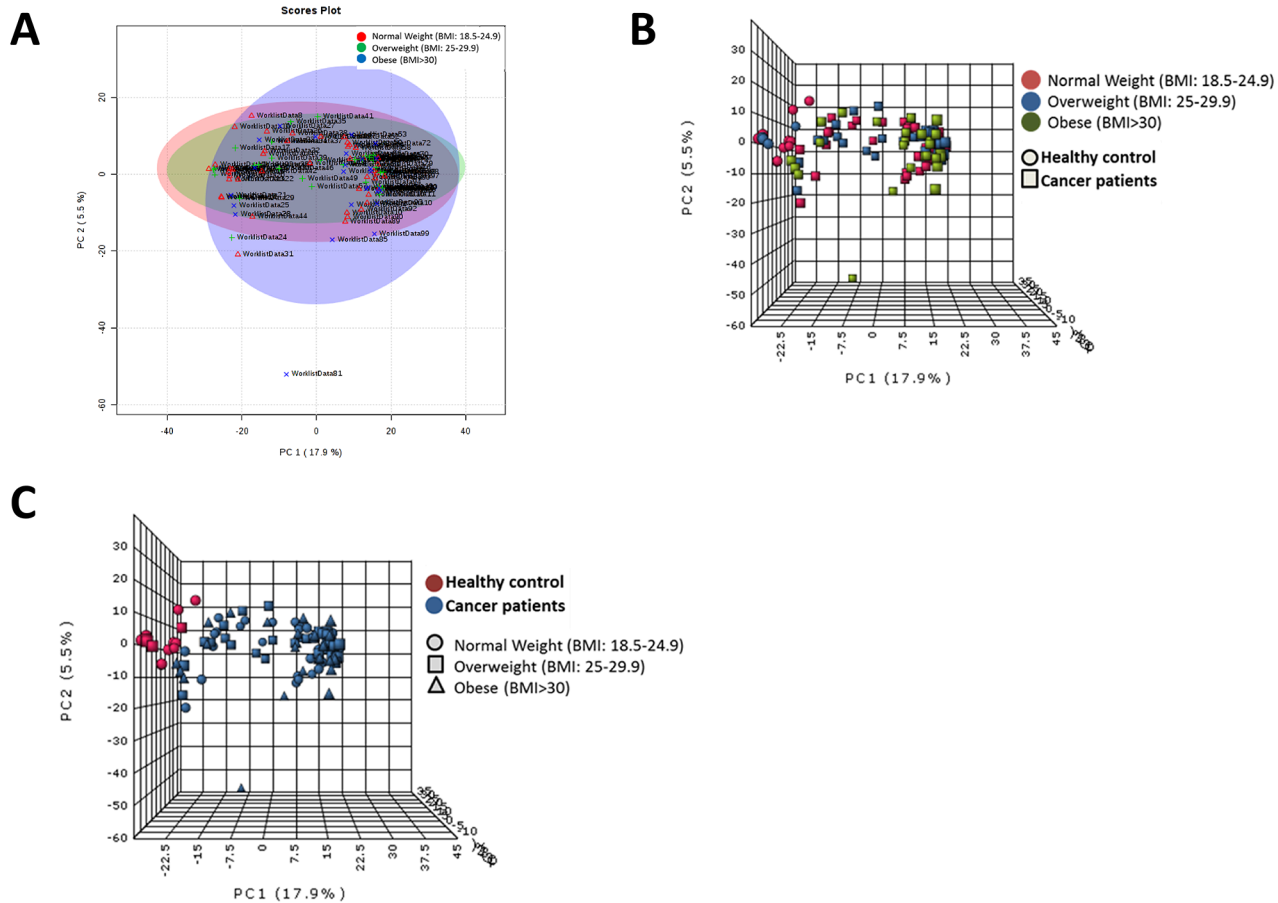

**Supplementary Figure 1: BMI variable do not determine a plasma specific metabolomic signature.** A. Principal component representation indicates that BMI is not an important factor describing metabolome in these samples. Specifically, cancer condition determines an specific metabolomic signature comparing with healthy controls, independently of BMI value of the subjects B. and C.

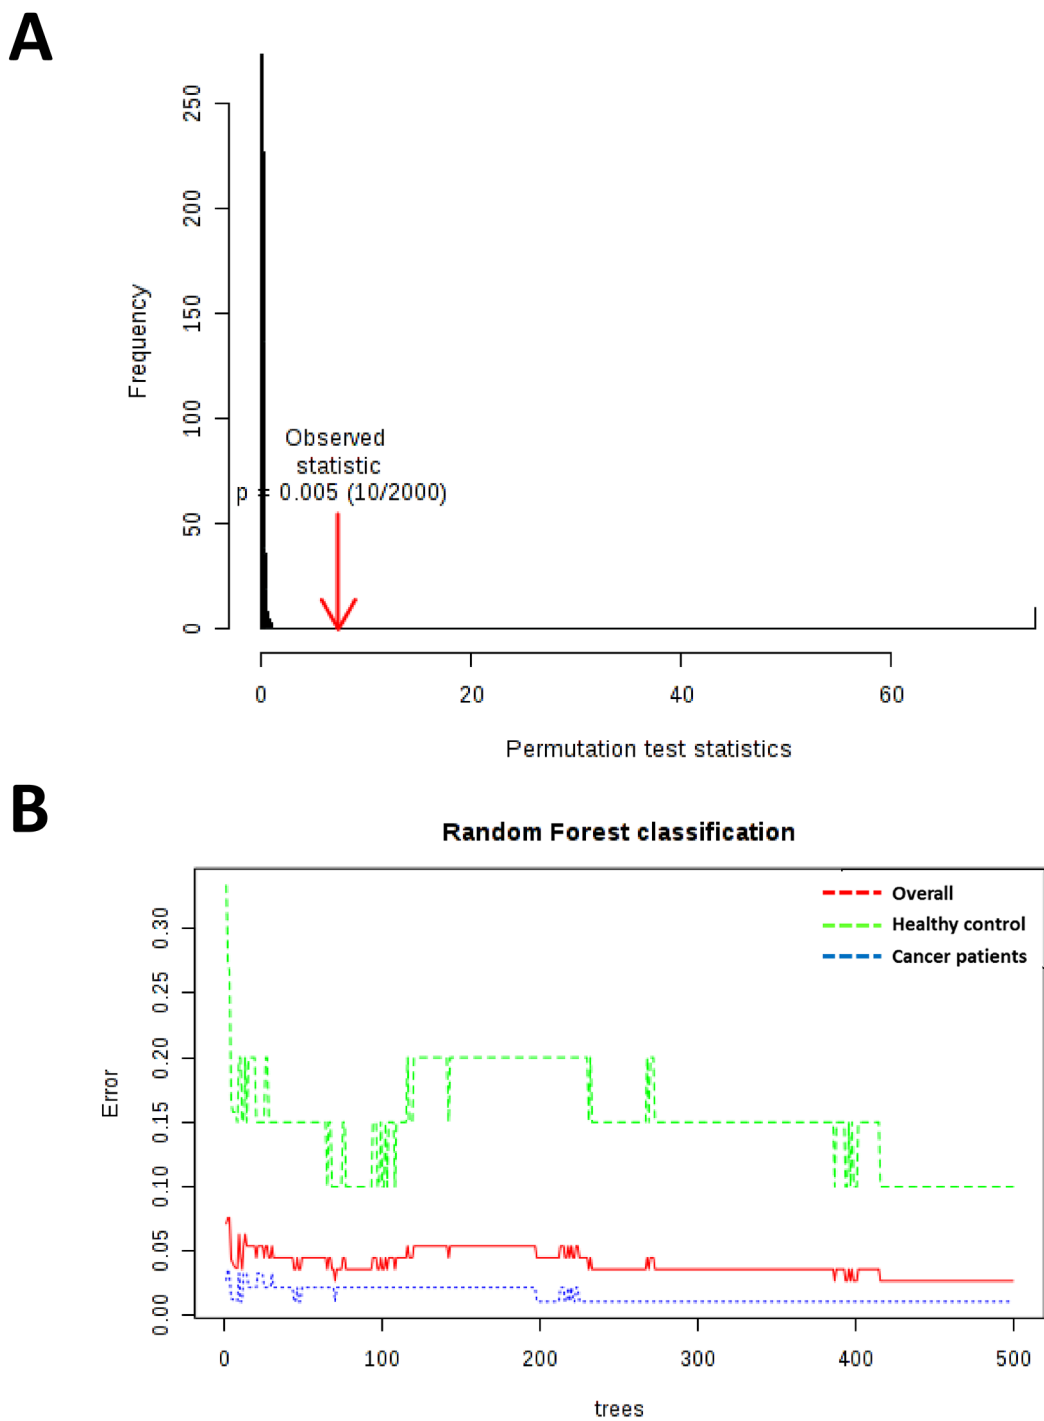

**Supplementary Figure 2: A.** Permutation test of PLS-DA using only the metabolites with a potential ID demonstrate that none of the distributions formed by the permuted data was better than the observed statistic based on the original data **B, C.** Random Forest classification shows and overall classification error of 0.027 using only that metabolites with a potential ID.

**Supplementary Table 1: PLS-DA cross validation details (using those molecules present at least in 50% of the samples of the same group)**

| Measure  | 1 comps | 2 comps | 3 comps | 4 comps | 5 comps |
|----------|---------|---------|---------|---------|---------|
| Accuracy | 0.948   | 1.0     | 0.98    | 0.97    | 0.98    |
| R2       | 0.57875 | 0.87072 | 0.94092 | 0.97992 | 0.99615 |
| Q2       | 0.49665 | 0.74071 | 0.77456 | 0.7795  | 0.77166 |

**Supplementary Table 2: PLS-DA cross validation details (using those molecules which present a significant difference ( $p < 0.05$ ) and with a potential identity)**

| Measure  | 1 comps | 2 comps | 3 comps | 4 comps | 5 comps |
|----------|---------|---------|---------|---------|---------|
| Accuracy | 0.97067 | 0.974   | 0.966   | 0.948   | 0.948   |
| R2       | 0.64092 | 0.79248 | 0.81766 | 0.82385 | 0.82633 |
| Q2       | 0.58961 | 0.69667 | 0.64811 | 0.6131  | 0.5879  |
